# Supplementary material
Source: PubMed Central journal article supplement (PMC4949078)
Supplement: NIHMS752931-supplement-supplement_1.pdf [file NIHMS752931-supplement-supplement_1.pdf]

**Supplementary Table 1.** Procedure codes for identification of treatment approach in SEER-Medicare data

| Data source                                       | Variable or code                                   | Treatment Approach                                                                               |                                                               |
|---------------------------------------------------|----------------------------------------------------|--------------------------------------------------------------------------------------------------|---------------------------------------------------------------|
|                                                   |                                                    | Surgery                                                                                          | Endoscopic Treatment                                          |
| SEER<br>(within 4 months of cancer diagnosis)     | SEER variable for surgery of primary site (sxpri1) | 30, 40, 50-55, 80                                                                                | 10-14, 20-27                                                  |
| Medicare<br>(within 6 months of cancer diagnosis) | Inpatient ICD-9-CM procedure codes                 | 42.40-42.42, 42.50-42.59, 42.60-42.69, 43.5, 43.99                                               | 42.33                                                         |
|                                                   | CPT codes                                          | 43100, 43101, 43107, 43108, 43112, 43113, 43116, 43117, 43118, 43119, 43121, 43122, 43123, 43124 | 43217, 43216, 43228, 43250, 43251, 43257, 43258, 96570, 96571 |
